# Supplementary material for: The complete mitochondrial DNA of the carnivorous sponge Lycopodina hypogea is putatively complemented by microDNAs
Source: PeerJ journal article supplement (doi:10.7717/peerj.18255), 2024-11-15
Supplement: supp_mat_S2.pdf [file supp_mat_S2.pdf]

## Supplementary Material S2 – BLAST searches for *putative* chrM2 and chrM3 in *Lycopodina hypogea* nuclear genome

Sequences from putative mitochondrial chromosomes 2 (*putative* chrM2) and 3 (*putative* chrM3) were searched through BLAST against the *Lycopodina hypogea* genome assembly (GCA\_963969325), which was made available in the last stage of this study, which does not report extra mitochondrial chromosomes. We were able to find *nd4l* (Figure S3) and *trnI(gau)* (Table S3) partial sequences across nuclear chromosomes, which seems to comprise recombination events.

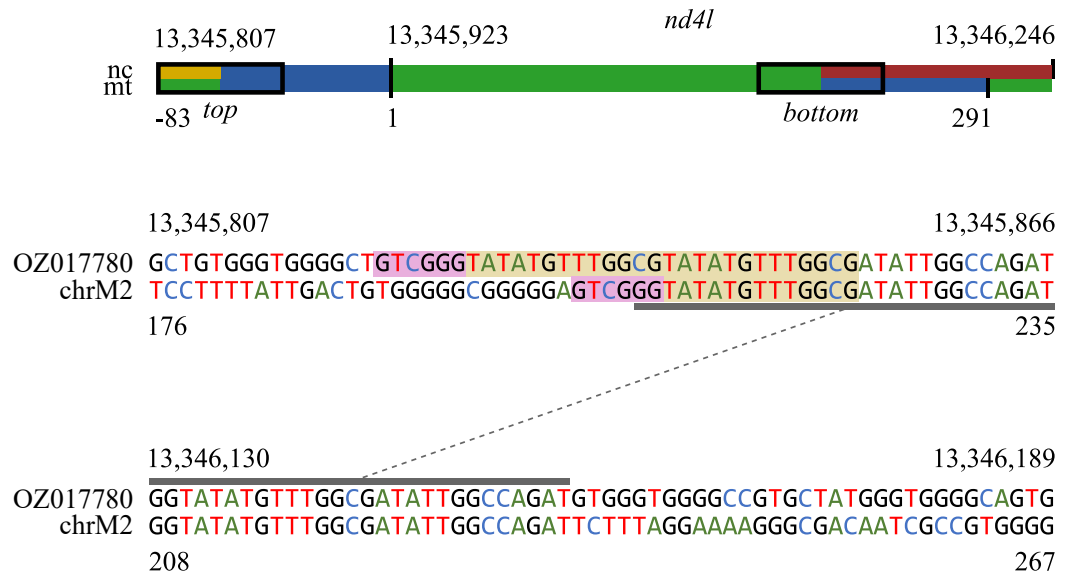

**Figure S3.** Comparison between *nd4l* from putative mitochondrial chromosome 2 (*putative* chrM2) and a sequence found in the nuclear genome of *Lycopodina hypogea*. Sequence OZ017780 comprises nuclear chromosome 2 of *L. hypogea*, sequences upstream (top) and downstream (bottom) putative starting codon of *nd4l* sequence found through BLAST search (OZ017780:13,345,923) showing divergent sequences, likely recombining.

**Table S3.** Significant BLAST hits of putative mitochondrial chromosome 3 (*putative* chrM3) sequence, 140 bp, against the the nuclear genome of *Lycopodina hypogea* made available in the last stage of this study.

| Nuclear genome | Location          | Strand | Number of matches | % identity |
|----------------|-------------------|--------|-------------------|------------|
| chr2           | 8676206–8676288   | +      | 83                | 98%        |
|                | 8676315–8676353   | +      | 39                | 95%        |
|                | 8676289–8676319   | +      | 31                | 100%       |
| chr6           | 7453580–7453677   | +      | 98                | 98%        |
| chr11          | 2781911–2781799   | -      | 113               | 95%        |
| chr13          | 6656309–6656418   | +      | 110               | 97%        |
| chr14          | 12747081–12747215 | +      | 135               | 89%        |
|                | 12790618–12790478 | -      | 140               | 87%        |
| chr15          | 3747041–3746936   | -      | 106               | 99%        |
