# Supplementary material for: The complete mitochondrial DNA of the carnivorous sponge Lycopodina hypogea is putatively complemented by microDNAs
Source: PeerJ journal article supplement (doi:10.7717/peerj.18255), 2024-11-15
Supplement: supp_mat_S3.pdf [file supp_mat_S3.pdf]

**Supplementary Material S3 – Secondary structures of tRNAs in the mitochondrial genome of *Lycopodium hypogea***

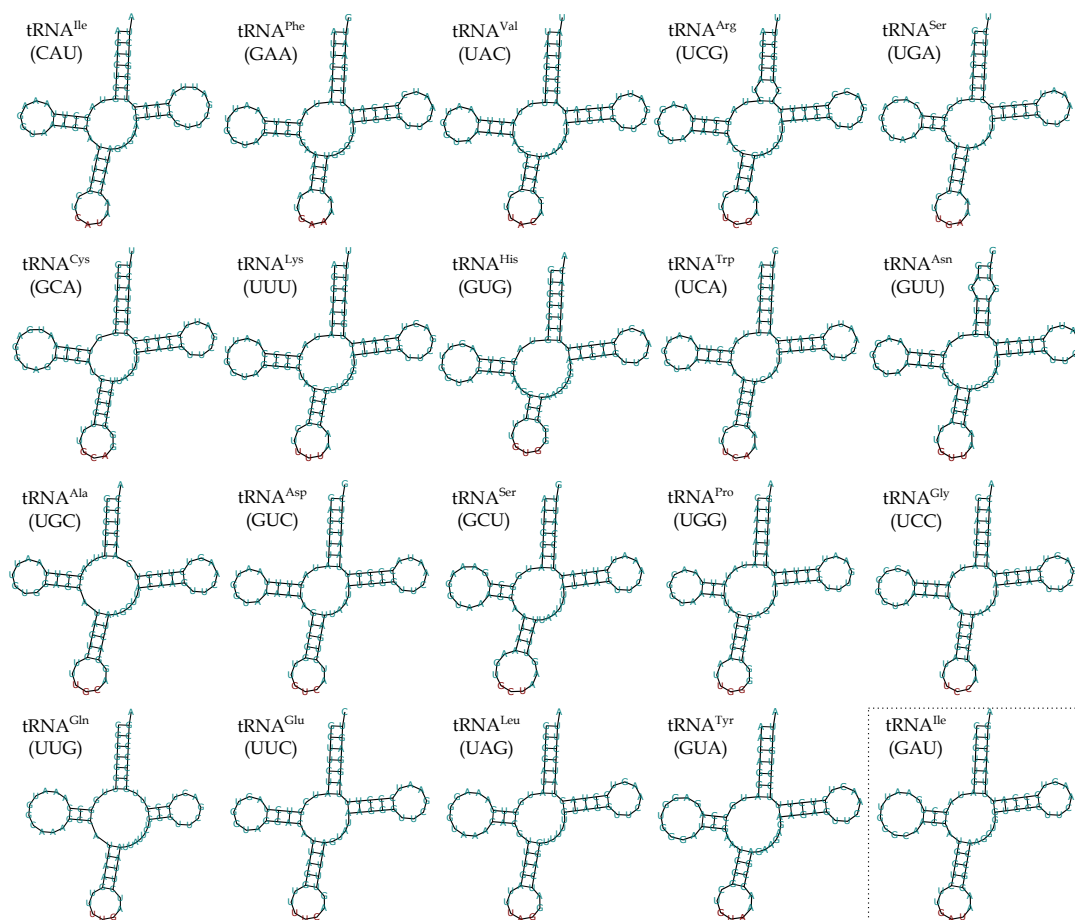

**Figure S4.** Transfer RNAs from the mitochondrial chromosome 1 (chrM1) and, in detail, putative mitochondrial chromosome 3 (*putative* chrM3). Anticodon sequences in red.
